# Supplementary material
Source: PubMed Central journal article supplement (PMC5617280)
Supplement: pnas.1706355114.sapp.pdf [file pnas.1706355114.sapp.pdf]

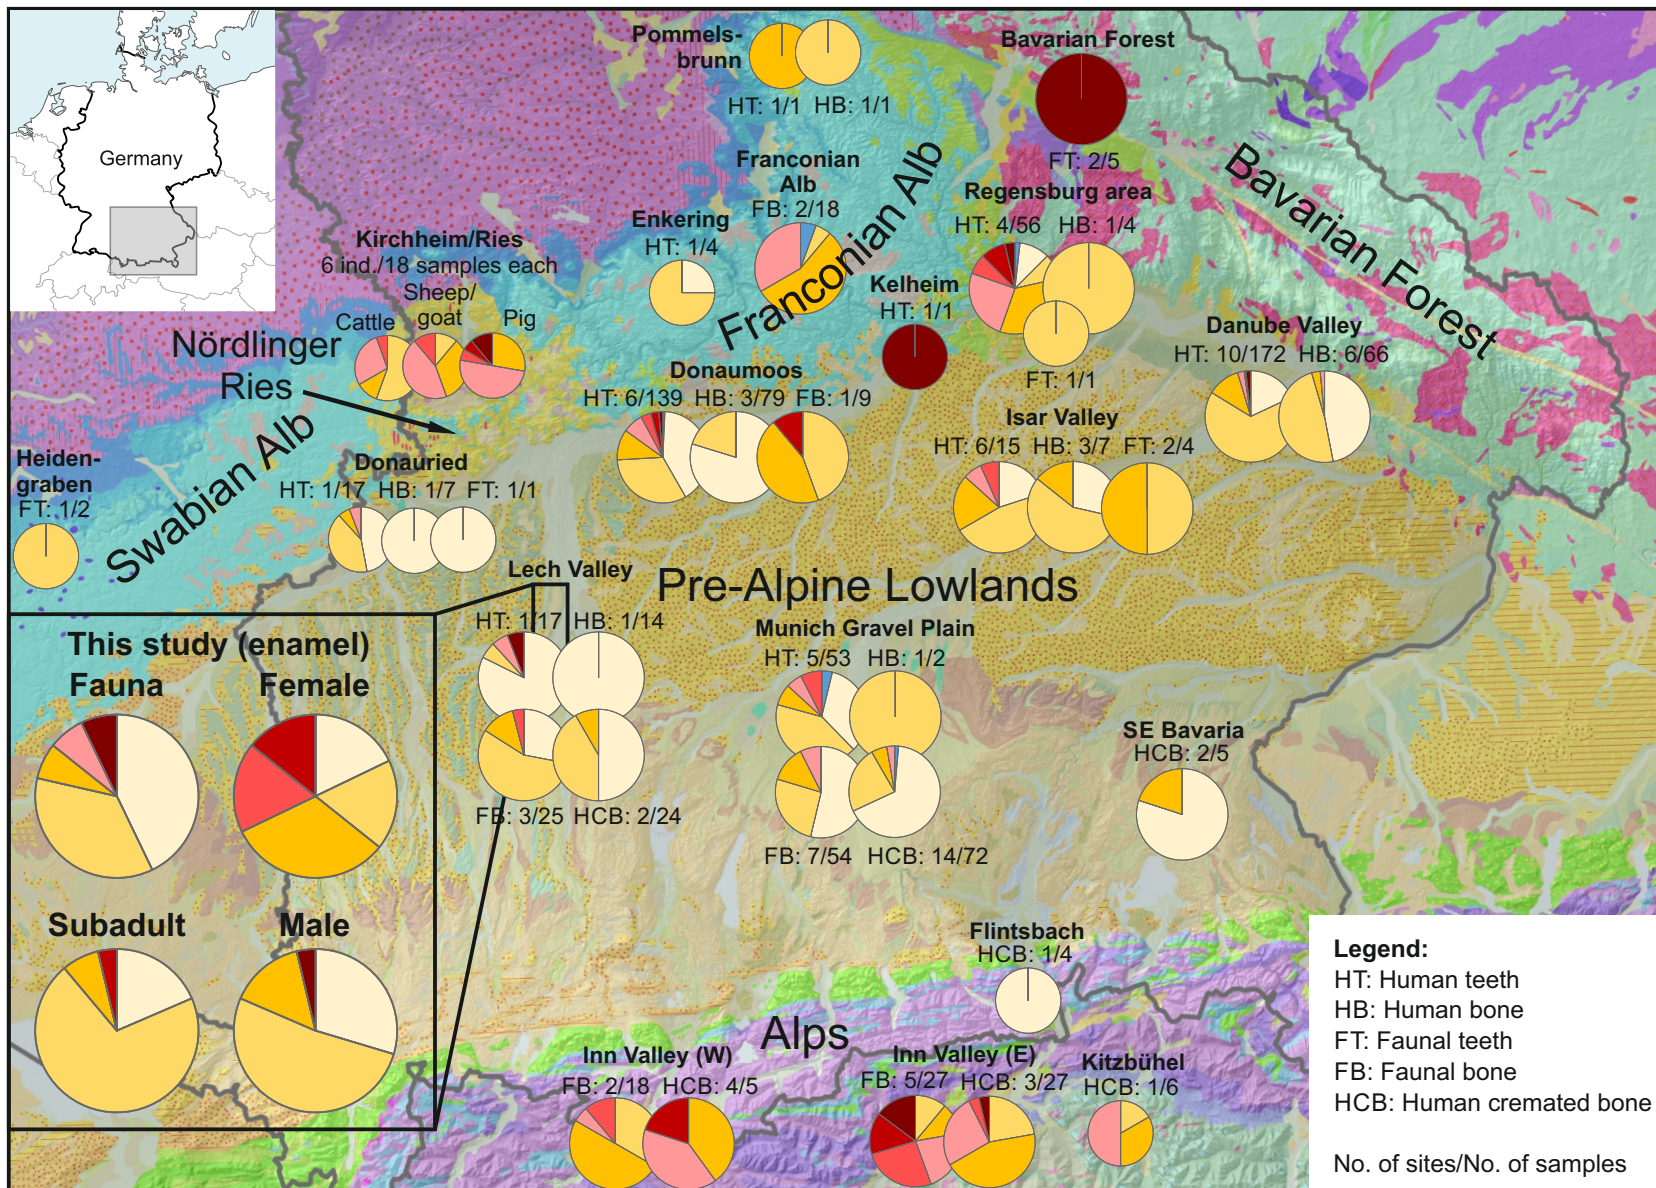

$^{87}\text{Sr}/^{86}\text{Sr}$

< 0.7080 0.7081-0.7090 0.7091-0.7100 0.7011-0.7110 0.7111-0.7120 0.7121-0.7130 > 0.7140

**SI Appendix, Fig. S1:** Geological map of southern Bavaria with a summary of published  $^{87}\text{Sr}/^{86}\text{Sr}$  ratios of different human and faunal sample types (cf. Dataset S1, Tab. 7). Small pie charts: single sites; large pie charts: multiple sites. The charts of the data for this study summarize single analyses per individual or the earlier forming tooth of tooth pairs. (Produced using Copernicus data and information funded by the European Union - EU-DEM layers; Shuttle Radar Topography Mission – SRTM V2 3 arc-seconds, NASA; Geology 1:1.000.000, © Bundesanstalt für Geowissenschaften und Rohstoffe (BGR). Graphic: C. Knipper, S. E. Metz). Legend for geological units on next page.

# Geology 1:1.000.000

## Sedimentary Rocks

- Cenozoic**
- Holocene**
- limnic gravel
  - bog lime
  - fen
  - fluviatile gravel
  - aeolian sand, dune
  - crenogenic gravel
  - lacustrine clay (foothills of the Alps)
  - loess, loess loam
- Pleistocene**
- fluviatile gravel
  - gravel of the glacial valleys
  - glacial gravel
  - sediment basin
  - fluviatile gravel
  - fluvioglacial to fluviatile gravel
  - glacial gravel
  - boulder clay
  - glacial gravel
  - fluviatile gravel
  - fluviatile gravel
  - loam of the Alb
- Tertiary**
- Pliocene
  - Miocene
  - Eocene
- Mesozoic**
- Cretaceous**
- Cretaceous
  - Upper Cretaceous
- Jurassic**
- Upper Jurassic
  - Lower Jurassic
  - Triassic
  - Keuper
  - Upper Keuper
  - Middle Keuper
  - Feuerletten, Knollenmergel
  - sandstone keuper
  - gypsum keuper, Schilfsandstein
  - Lower Keuper
  - Muschelkalk
  - Upper Muschelkalk
  - Middle Muschelkalk
  - Lower Muschelkalk
  - Buntsandstein
  - Upper Buntsandstein
- Triassic**
- Palaeozoic**
- Permian**
- Zechstein
  - Rotliegendes
  - Upper Rotliegendes
  - Lower Rotliegendes
  - Upper Carboniferous
  - Silurian
- Proterozoic**
- Younger Proterozoic

## Astrobleme

- impact lithologies and displaced massifs
- displaced metamorphite
- suevite

## Igneous Rocks

### Volcanic

- basalt
- keratophyr
- diabase, spilite
- amphibolite

### Dykite

- porphyroid granite

### Plutonic

- granite
- gabbro
- granite
- granodiorite
- diorite
- orthogneiss
- meta-granite
- meta-granodiorite

## Alpine Genesis and Molasse

### Molasse

- Upper Freshwater Molasse
- Upper Marine Molasse
- Lower Freshwater Molasse
- Lower Marine Molasse

### Helveticum

- Jurassic - Eocene
- Upper Cretaceous - Oligocene

### Penninicum

- chalk - Eocene; flysch zone
- Bündner schist
- ophiolite
- Permian - Lower Triassic
- Older schist shell of the Tauern
- Arosler Schuppenzone

### Pennine-Eastern Alpine Schuppenzone

- Jurassic

### Eastern Alpine

- Jurassic - Cretaceous
- Jurassic
- Upper Triassic
- Middle Triassic
- Permian - Lower Triassic
- Palaeozoic
- porphyroid
- greenschist
- Early Palaeozoic (quartz phyllite)
- mica schist
- paragneiss
- amphibolite

### Transgressive Layers above the Eastern Alpine Nappes

- Gosau (Upper Cretaceous - Tertiary)

## Miscellaneous

- waters

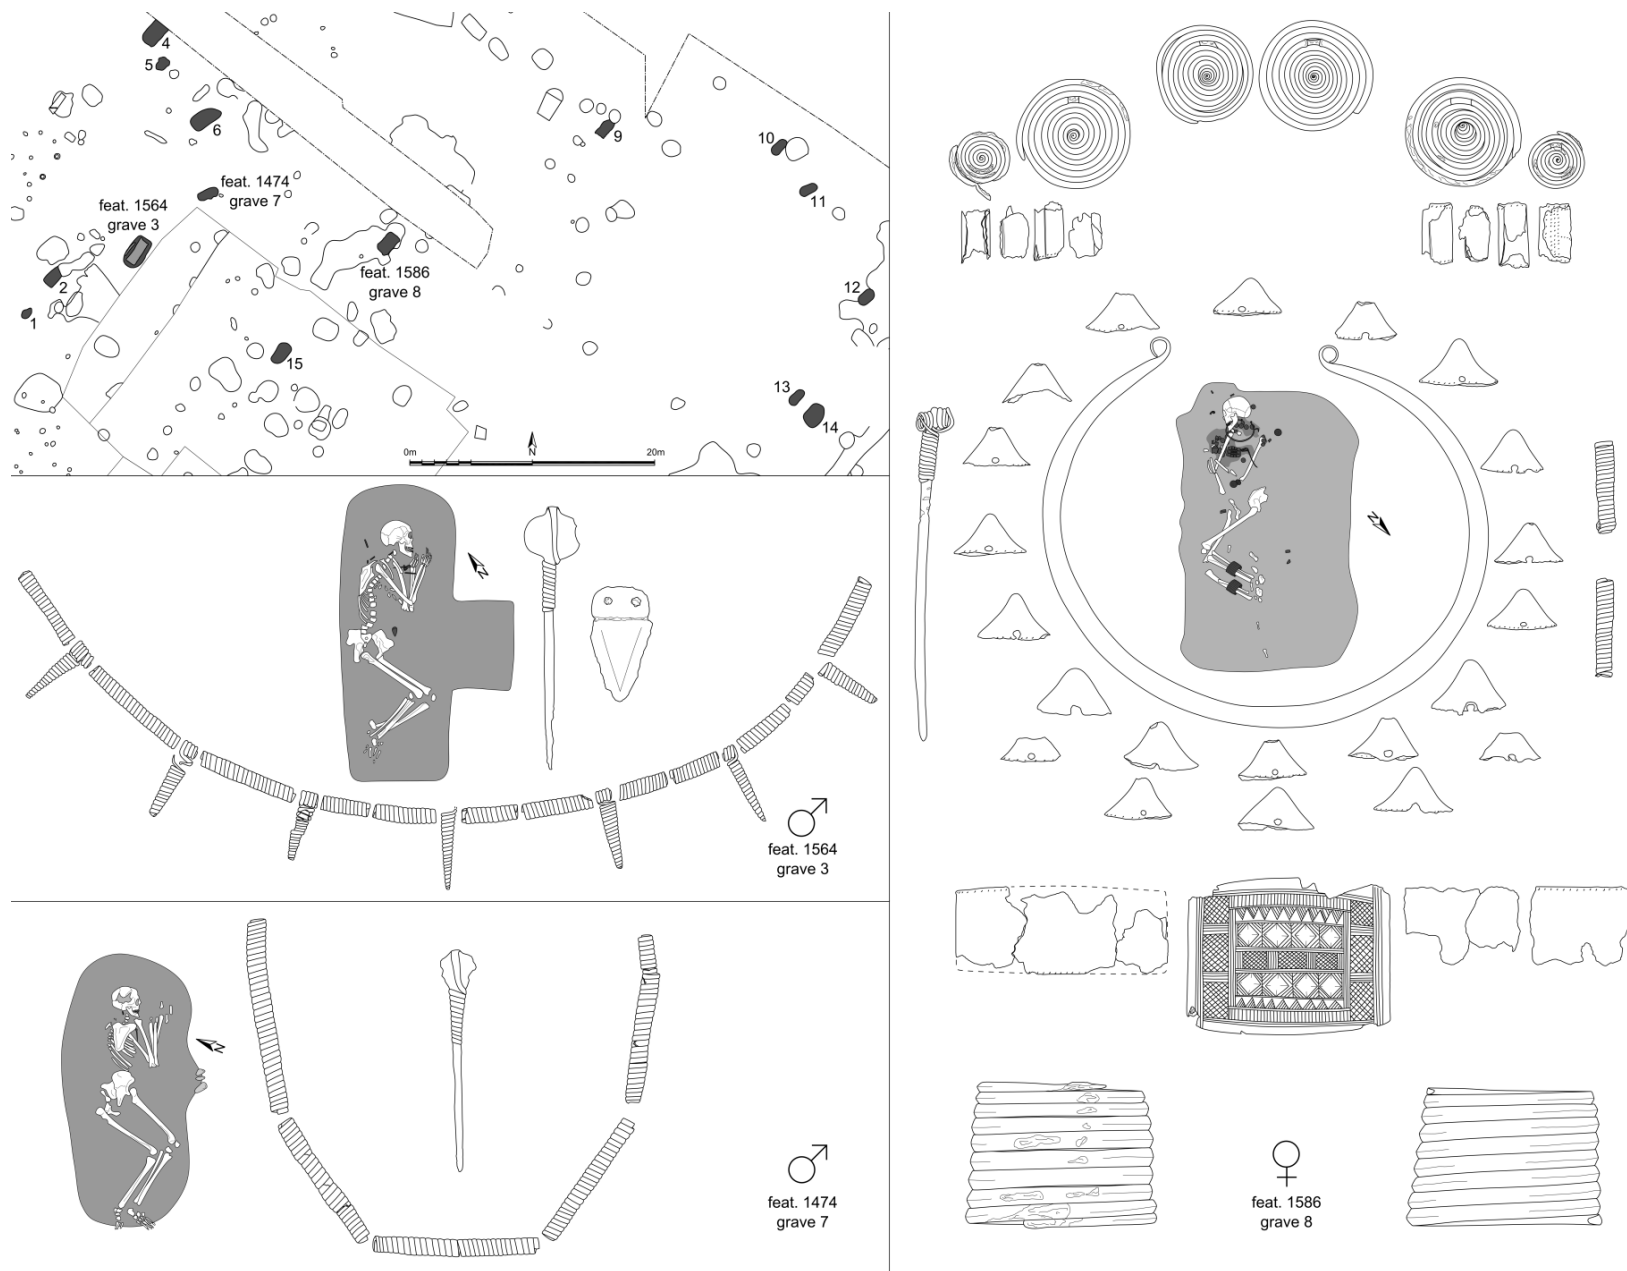

**SI Appendix, Fig. S2:** Archaeological characteristics of three individuals with shared mtDNA haplotypes from Wehringen-Hochfeld (Graphic: K. Massy).

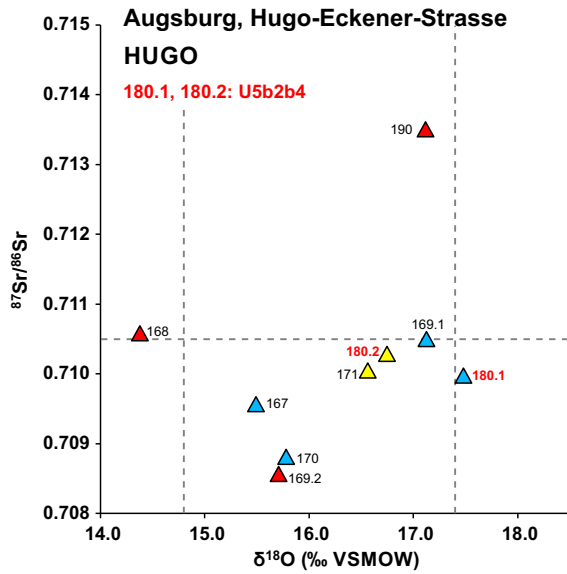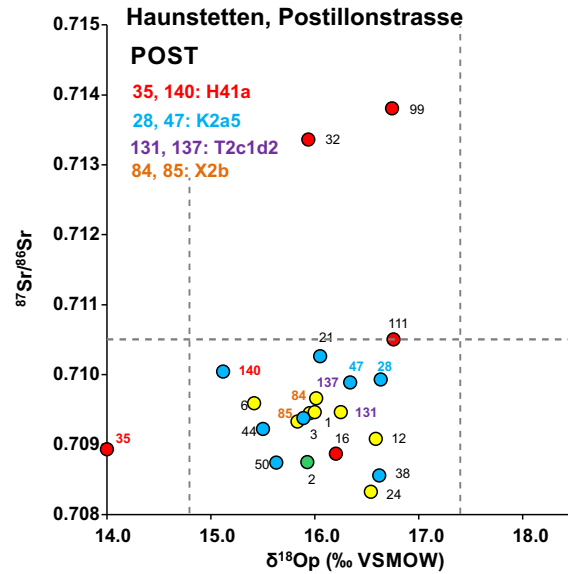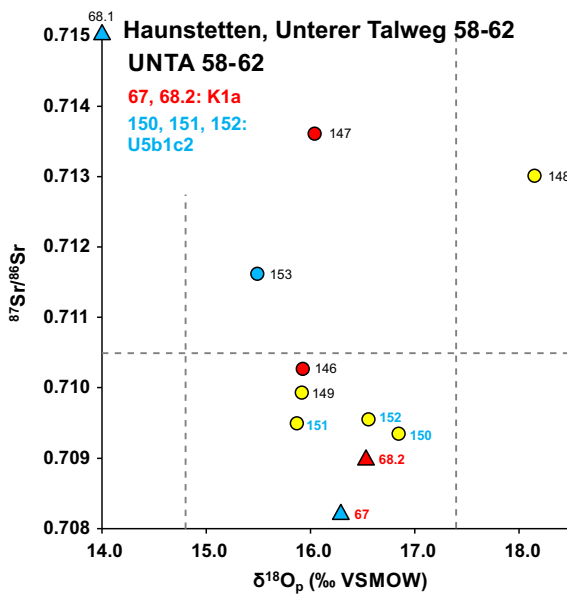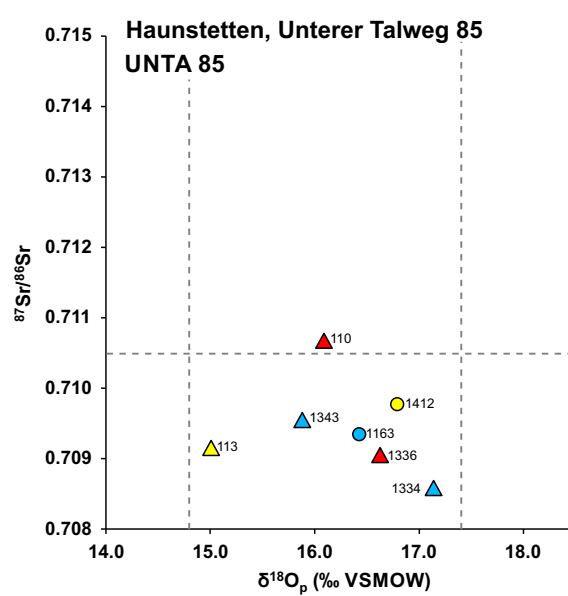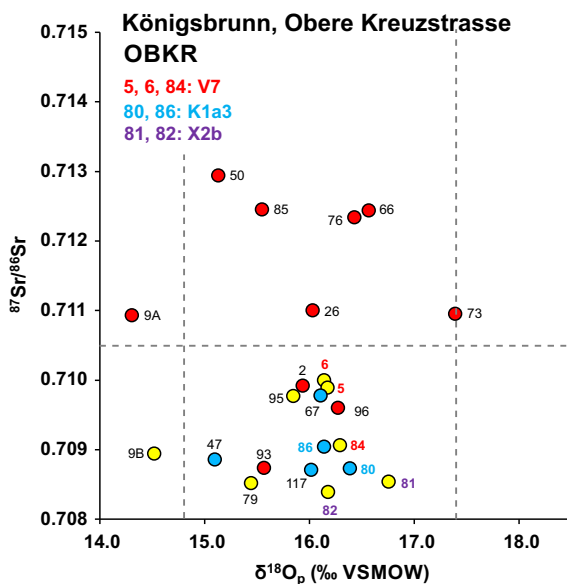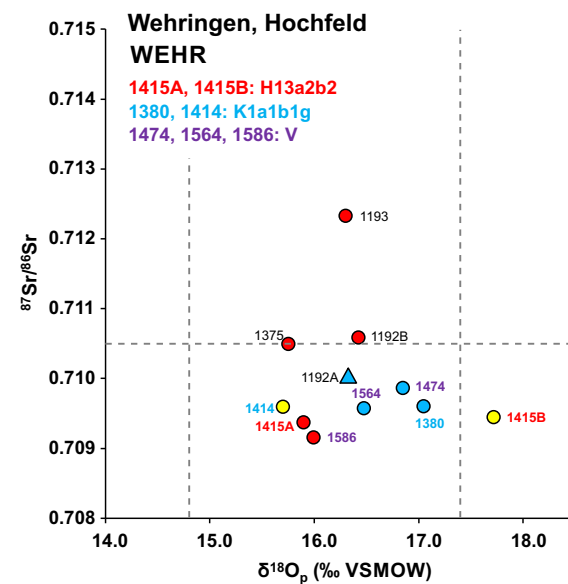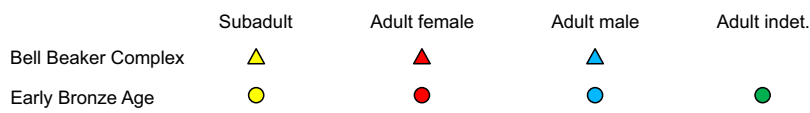

**SI Appendix, Fig. S3:** Scatter plots of  $\delta^{18}\text{O}$  and  $^{87}\text{Sr}/^{86}\text{Sr}$  ratios according to the investigated sites. The feature numbers of individuals with shared mtDNA haplotypes are highlighted with fat labels in the same colour. The hatched lines indicate the local ranges for both isotope ratios (cf. SI Appendix, Fig. S4 and SI Appendix, Fig. S5). Data plotted on the y-axis lack  $\delta^{18}\text{O}$  data (Graphic: C. Knipper).

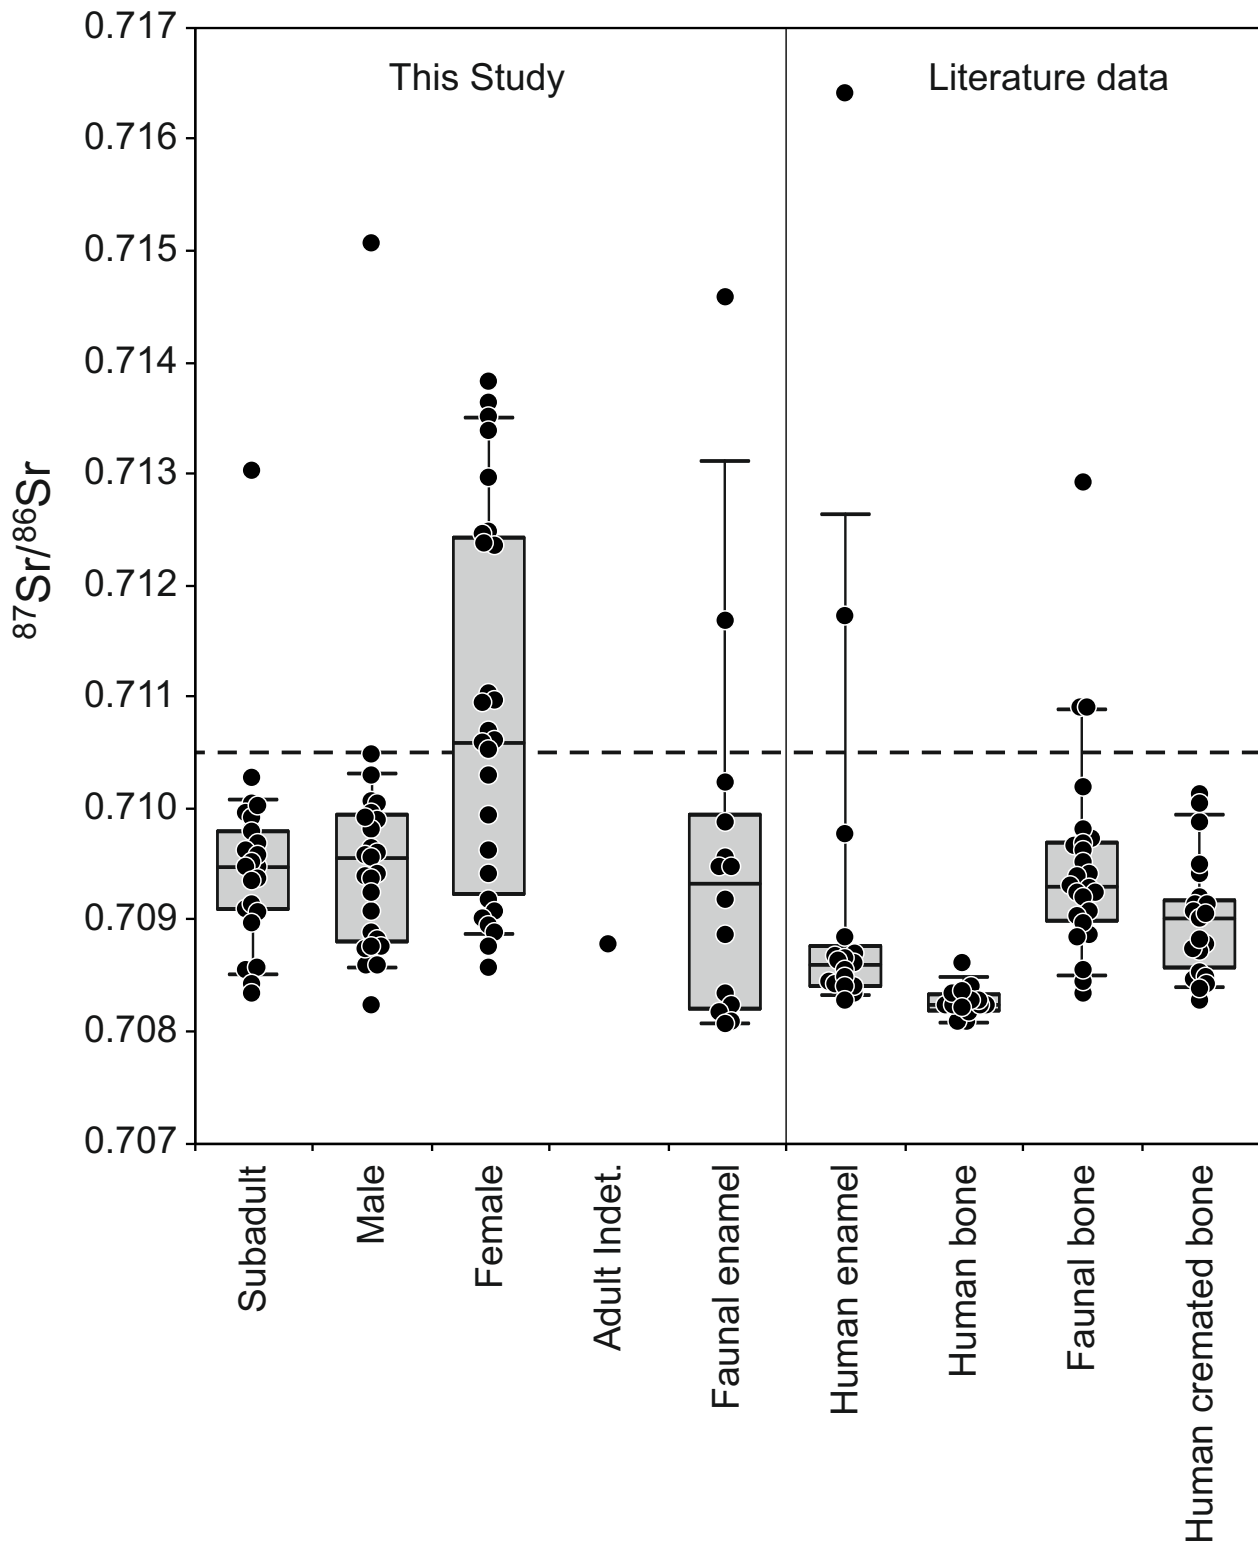

**SI Appendix, Fig. S4:** Box plots of  $^{87}\text{Sr}/^{86}\text{Sr}$  ratios of human and faunal samples from the Lech valley analysed in this study and of teeth and bones from the Bell Beaker Complex cemetery of Augsburg-Universität (1), of faunal bones from Wehringen, Schwabmünchen, and Pestenacker and cremated human bones from Kleinaitingen and Königsbrunn (2) (cf. Dataset S1, Tab. 6 and Dataset S1, Tab. 7; Graphic: C. Knipper).

References:

1. Price TD, Knipper C, Grupe G, & Smrcka V (2004) Strontium isotopes and prehistoric human migration: The Bell Beaker period in central Europe. *European Journal of Archaeology* 7(1):9-40.
2. Toncala A, et al. (2017) Isotopic map of the Inn-Eisack-Adige-Brenner passage and its application to prehistoric human cremations. *Across the Alps in prehistory. Isotopic mapping of the Brenner passage by bioarchaeology* eds Grupe G, Grigat A, & McGlynn G (Springer, Heidelberg), pp 127-227.

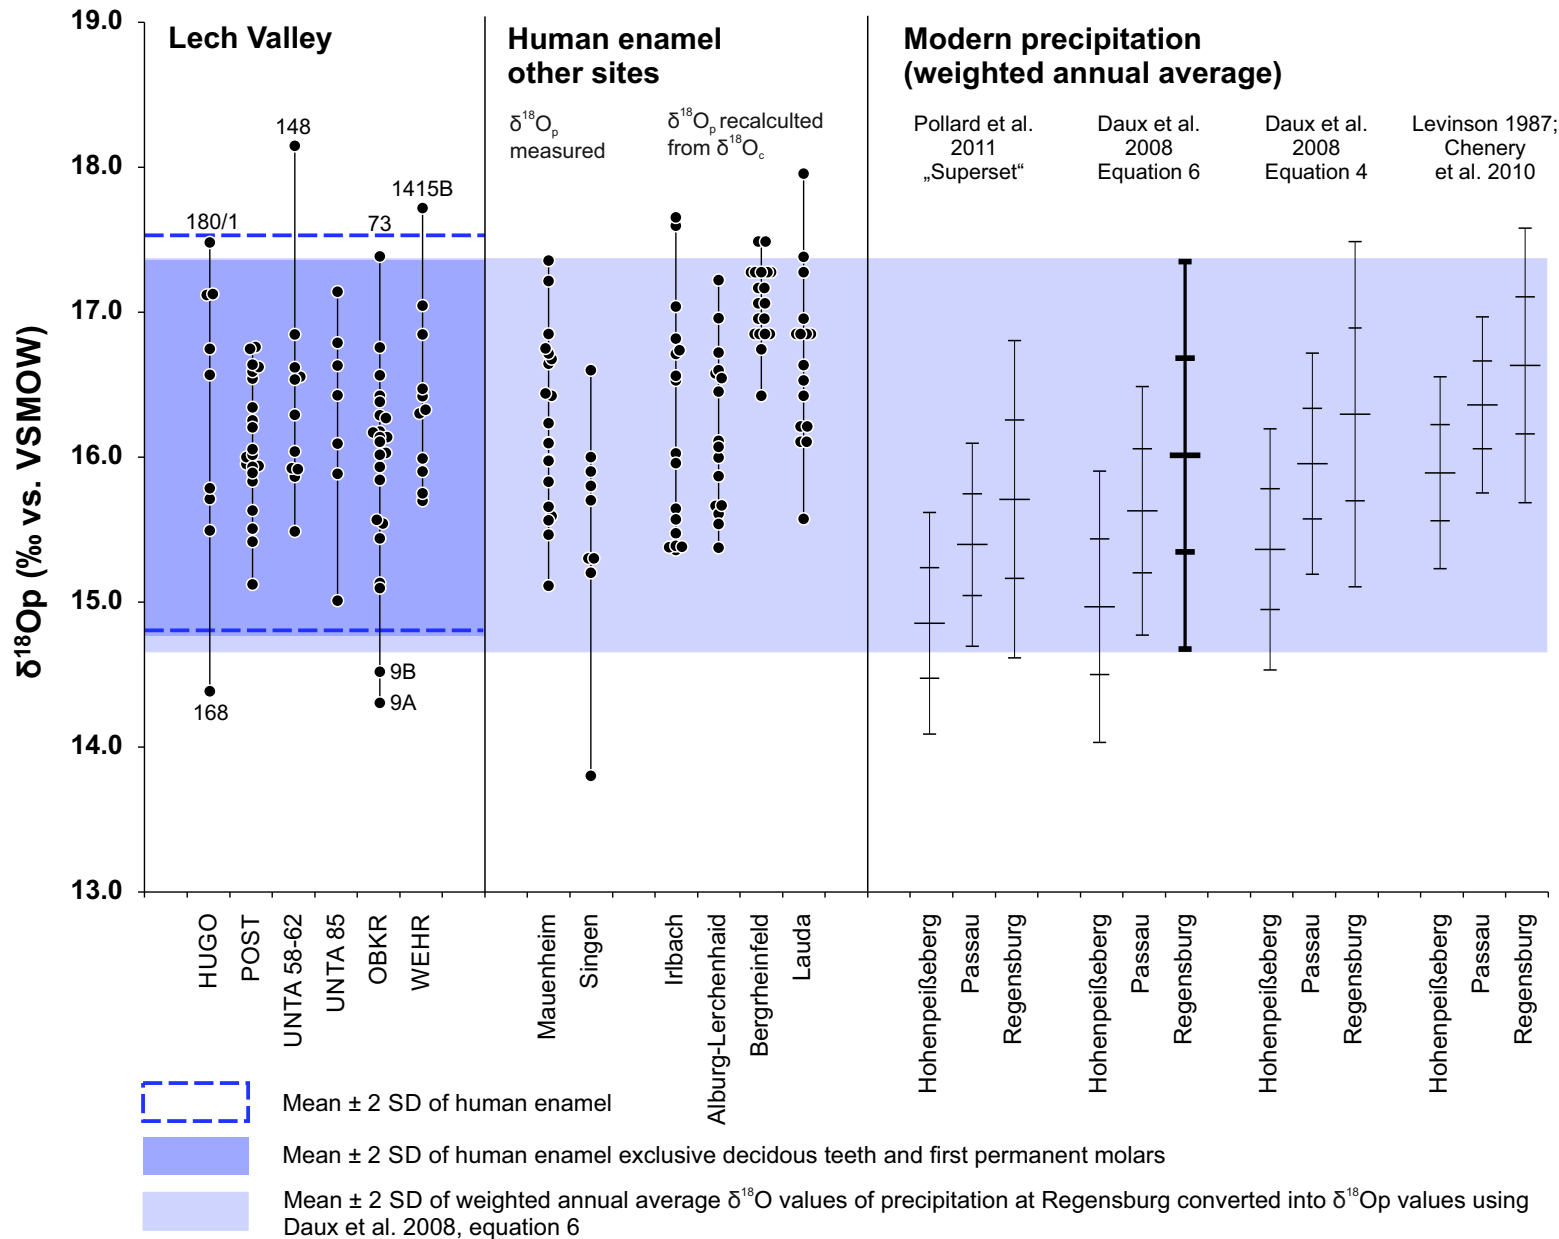

### References

- Knipper C & Maus M (2016) Isotopenanalysen zur Rekonstruktion von Mobilität und Ernährungsweise der Bestatteten der hallstattzeitlichen Nekropole von Mauenheim. *Mauenheim und Barga. Zwei Grabhügelfelder der Hallstatt- und Frühlatènezeit aus dem nördlichen Hegau*, ed Wamser L (Wiesbaden), pp 461-486.
- Oelze VM, Nehlich O, & Richards MP (2012) 'There's no place like home' - no isotopic evidence for mobility at the early Bronze age cemetery of Singen, Germany. *Archaeometry* 54(4):752-778.
- Bertemes F & Heyd V (2015) 2200 BC – Innovation or Evolution? The genesis of the Danubian Early Bronze Age. *2200 BC – A climatic breakdown as a cause for the collapse of the old world?* eds Meller H, Risch R, Jung R, & Arz H-W (Halle/Saale), pp 561-578.
- Sjögren K-G, Price TD, & Kristiansen K (2016) Diet and Mobility in the Corded Ware of Central Europe. *PLoS ONE* 11(5): e0155083.
- AEA/WMO (2016) Global Network of Isotopes in Precipitation. The GNIP Database. <http://www.iaea.org/water>.
- Pollard AM, Pellegrini M, & Lee-Thorp JA (2011) Technical Note: Some observations on the conversion of dental enamel  $\delta^{18}\text{O}_p$  values to  $\delta^{18}\text{O}_c$  to determine human mobility. *American Journal of Physical Anthropology* 145:499-504.
- Daux V, et al. (2008) Oxygen isotope fractionation between human phosphate and water revisited. *Journal of Human Evolution* 55(6):1138-1147.
- Levinson AA, Luz B, & Kolodny Y (1987) Variations in oxygen isotopic compositions of human teeth and urinary stones. *Applied Geochemistry* 2(4):367-371.
- Chenery C, Müldner G, Evans J, Eckardt H, & Lewis M (2010) Strontium and stable isotope evidence for diet and mobility in Roman Gloucester, UK. *Journal of Archaeological Science* 37(1):150-163.

**SI Appendix, Fig. S5:** Oxygen isotope data of BBC and EBA individuals from the Lech Valley sorted by site, other cemeteries in southern Germany (1-4) and weighted annual average values of modern precipitation (5) converted into  $\delta^{18}\text{O}_p$  values using different regression equations (6-9) (Graphic: C. Knipper).

## **SI Appendix, Text S1: Rationale und laboratory methods of strontium and oxygen isotope analyses**

### *Strontium isotope analysis*

Strontium isotope ratios ( $^{87}\text{Sr}/^{86}\text{Sr}$ ) of tooth enamel reflect the geological conditions of the area from which food and drink were sourced during childhood (1-6). Provided that the majority of foodstuffs were grown locally, the method can identify individuals who were non-local to the site where their skeletal remains were found. The alkaline earth metal strontium has four stable isotopes ( $^{84}\text{Sr}$ ,  $^{86}\text{Sr}$ ,  $^{87}\text{Sr}$  and  $^{88}\text{Sr}$ ) of which  $^{87}\text{Sr}$  is radiogenic and results from radioactive decay of the isotope  $^{87}\text{Rb}$  (rubidium). Depending on the rubidium content of a rock and its age, the amount of  $^{87}\text{Sr}$  – expressed as the  $^{87}\text{Sr}/^{86}\text{Sr}$  ratio – varies among geological units between about 0.7000 and 0.7500 and occasionally above. When rocks and soils weather, strontium is released into water and becomes biologically available. Due to their similar ionic radii and chemical properties, strontium can substitute for calcium and is transferred through food chains without any significant isotope fractionation. The analytical method used here corrects against any mass dependent fractionation and therefore the presented  $^{87}\text{Sr}/^{86}\text{Sr}$  ratios do not show any source effects. Depending on the strontium concentrations of the ingested matter, plant-based food often contributes more strontium than water and meat. In animals and humans, strontium is primarily incorporated into hydroxyapatite ( $\text{Ca}_{10}(\text{PO}_4)_6\text{OH}_2$ ), the inorganic component of teeth and bones. Because the enamel of tooth crowns forms during certain time intervals in childhood, does not remodel afterwards and is very resistant to post-mortem alteration, it is a persisting archive of strontium that goes back to the early years of a person's or animal's life. Deviation of  $^{87}\text{Sr}/^{86}\text{Sr}$  ratios of teeth from the local baseline values or breaks in the data distribution from a single site or delimited area can indicate migrant individuals.

Strontium isotope analysis was carried out on human second permanent molars or on other teeth if second molars were not available. Faunal comparison samples were selected depending on availability. High-crowned molars of cattle and sheep/goats were sampled near the apex and near the cervix to identify possible isotopic variation along the crown. Enamel chips were separated from the crowns using a diamond-coated cutting disc attached to a dental drill. All surfaces and adhering dentine were removed thoroughly with a diamond-coated burr, and the resulting chips ground in an agate mortar. 10-12 mg of enamel powder were then pre-cleaned in an ultrasonic bath using de-ionised  $\text{H}_2\text{O}$  and 0.1 M acetic acid buffered with Li-acetate (pH 4.5) and afterwards ashed (3 h,  $850^\circ\text{C}$ ) (7). Sr separation using Eichrom Sr-Spec resin was done under clean-lab conditions following the procedures described in Knipper (7). Sr concentrations were determined by Quadrupole-Inductively Coupled Plasma-Mass Spectrometry (Q-ICP-MS) and  $^{87}\text{Sr}/^{86}\text{Sr}$  ratios by High-Resolution Multi Collector-ICP-MS (Neptune) at the Curt-Engelhorn-Centre for Archaeometry in Mannheim, Germany. Raw data were corrected according to the exponential mass fractionation law to  $^{88}\text{Sr}/^{86}\text{Sr} = 8.375209$ . Blank values were lower than 10 pg Sr during the whole clean lab procedure. The NBS 987

and Eimer & Amend (E & A) standards run along with the human samples yielded  $^{87}\text{Sr}/^{86}\text{Sr}$  ratios of  $0.71024 \pm 0.00003$ ,  $2 \sigma$ ;  $n = 9$  and  $0.70801 \pm 0.00005$ ,  $2 \sigma$ ;  $n = 26$ , respectively. The NBS 987 and Eimer & Amend (E & A) standards run along with the faunal comparison samples yielded  $^{87}\text{Sr}/^{86}\text{Sr}$  ratios of  $0.71024 \pm 0.00001$ ,  $2 \sigma$ ;  $n = 5$  and  $0.70802 \pm 0.00002$ ,  $2 \sigma$ ;  $n = 6$ , respectively.

### *Oxygen isotope analysis*

Oxygen isotope analysis served as an analytical approach to identify non-local individuals independent of the prevailing geological conditions. The method builds on spatial variation of the isotopic composition ( $^{18}\text{O}/^{16}\text{O}$  expressed as  $\delta^{18}\text{O}$  in ‰ vs. V-SMOW [Vienna-Standard Mean Ocean Water]) of the oxygen bound in meteoric water ( $\delta^{18}\text{O}_{\text{mw}}$ ), which is taken up by animals and humans via drinking water and food. The  $\delta^{18}\text{O}_{\text{mw}}$  values in precipitation, ground and surface water depend on temperature, altitude, latitude, and distance from the ocean, and therefore differ regionally (8, 9). In mammalian teeth and bones, oxygen is bound to the phosphate fraction ( $\delta^{18}\text{O}_{\text{p}}$ ) or the structural carbonate ( $\delta^{18}\text{O}_{\text{c}}$ ) of the hydroxyapatite. Its light stable isotopes fractionate during metabolic processes and incorporation into the biological hard tissues. However, due to the constant body temperatures of mammals, this happens at constant rates and linear regression equations can be used to estimate the isotopic composition of the imbibed water from the oxygen isotope ratios found in teeth and bones (10-13). In order to identify non-local individuals, the data from a site or study area can be tested for outliers, compared with previously existing datasets, or converted to  $\delta^{18}\text{O}_{\text{mw}}$  values and compared to the isotopic composition of modern meteoric water. Interpretations of  $\delta^{18}\text{O}$  data also have to consider that short-term climatic changes (14), breastfeeding in early childhood when the analysed enamel was formed (15) and preparation of food and drink (16) may cause isotope data similar to what would be considered indication for a non-local origin.

In this study, we focussed on  $\delta^{18}\text{O}_{\text{p}}$  values. In order to avoid breast feeding effects, sampling concentrated on second permanent molars whose enamel forms between about three and seven years of age (17, 18). In all cases, oxygen and strontium isotope analyses were carried out on aliquots of the same enamel powder following the procedure described in Knipper (19). 10 mg of enamel were pre-treated with 1.8 ml of 2.5 % NaOCl for 24 h and rinsed three times with suprapure water. The preparation of silver phosphate ( $\text{Ag}_3\text{PO}_4$ ) followed the method described by Dettman (20) and modified by Tütken (21). 800  $\mu\text{l}$  of 2 M HF were added to the pre-treated samples, shaken and left to react over-night. After vortexing and centrifuging, the solutions were transferred into new sample tubes and the CaF residues left behind. A few drops of bromothymol blue indicator were added, and the HF neutralized with about 140  $\mu\text{l}$  of 25 %  $\text{NH}_4\text{OH}$  solution. The addition of 800  $\mu\text{l}$  of 2 M  $\text{AgNO}_3$  solution caused the dissolved phosphate ions to precipitate immediately as yellow  $\text{Ag}_3\text{PO}_4$  crystals. These were washed and sonicated five times for 10 min and dried over-night at  $50^\circ\text{C}$ .  $\text{Ag}_3\text{PO}_4$  was



analysed in triplicates using a TC-EA at 1450°C coupled to a High Performance Stable Isotope Ratio Mass Spectrometer (IsoPrime100) at the Department for Applied and Analytical Palaeontology at the University of Mainz. Raw data were normalized against IVA silver phosphate with  $\delta^{18}\text{O} = 21.7 \text{ ‰}$  (certificate no: BN 180097).  $\text{Ag}_3\text{PO}_4$  that was precipitated from NBS 120c prepared along with the samples gave  $\delta^{18}\text{O}$  values of  $22.2 \pm 0.2 \text{ ‰}$  ( $n = 18$ ), which is in the range of values reported by Vennemann (22) and well comparable with earlier published data (19). The in-house standards of synthetic hydroxyapatite (HAP) gave  $17.1 \pm 0.1 \text{ ‰}$  ( $n = 21$ ) and Roman pig bones from the site of Dangstetten (SUS-DAN) gave  $14.2 \pm 0.2 \text{ ‰}$  ( $n = 21$ ).

### References

1. Ericson JE (1985) Strontium isotope characterization in the study of prehistoric human ecology. *Journal of Human Evolution* 14:503-514.
2. Bentley RA (2006) Strontium isotopes from the earth to the archaeological skeleton: A review. *Journal of Archaeological Method and Theory* 13(3):135-187.
3. Knipper C (2004) Die Strontiumisotopenanalyse: eine naturwissenschaftliche Methode zur Erfassung von Mobilität in der Ur- und Frühgeschichte. *Jahrbuch des Römisch-Germanischen Zentralmuseums Mainz* 51:589-685.
4. Capo RC, Stewart BW, & Chadwick OA (1998) Strontium isotopes as tracers of ecosystem processes: theory and methods. *Geoderma* 82(1-3):197-225.
5. Price TD, Burton JH, & Bentley RA (2002) The characterization of biologically available strontium isotope ratios for the study of prehistoric migration. *Archaeometry* 44(1):117-135.
6. Burton JH & Price TD (2013) Seeking the local  $^{87}\text{Sr}/^{86}\text{Sr}$  ratio to determine geographic origins of humans. *Archaeological Chemistry III*, ACS Symposium Series 1147, eds Armitage RA & Burton JH (American Chemical Society, Washington, DC), pp 309-320.
7. Knipper C, *et al.* (2012) Mobility in Thuringia or mobile Thuringians: a strontium isotope study from early Medieval central Germany. *Migrations in Prehistory and Early History. Stable Isotopes and Population Genetics*, Berlin Studies of the Ancient World 5, eds Kaiser E, Burger J, & Schier W (De Gruyter, Berlin), pp 293-317.
8. Bowen GJ & Wilkinson B (2002) Spatial distribution of  $\delta^{18}\text{O}$  in meteoric precipitation. *Geology* 30(4):315-318.
9. Kohn MJ & Welker JM (2005) On the temperature correlation of  $\delta^{18}\text{O}$  in modern precipitation. *Earth and Planetary Science Letters* 231(1-2):87-96.
10. Levinson AA, Luz B, & Kolodny Y (1987) Variations in oxygen isotopic compositions of human teeth and urinary stones. *Applied Geochemistry* 2(4):367-371.

11. Longinelli A (1984) Oxygen isotopes in mammal bone phosphate: A new tool for paleohydrological and paleoclimatological research? *Geochimica et Cosmochimica Acta* 48(2):385-390.
12. Luz B, Kolodny Y, & Horowitz M (1984) Fractionation of oxygen isotopes between mammalian bone-phosphate and environmental drinking water. *Geochimica et Cosmochimica Acta* 48:1689-1693.
13. Chenery CA, Pashley V, Lamb AL, Sloane HJ, & Evans JA (2012) The oxygen isotope relationship between the phosphate and structural carbonate fractions of human bioapatite. *Rapid Communications in Mass Spectrometry* 26:309-319.
14. Daux V, Lécuyer C, Adam F, Martineau F, & Vimeux F (2005) Oxygen isotope composition of human teeth and the record of climate changes in France (Lorraine) during the last 1700 years. *Climatic Change* 70:445-464.
15. Wright LE & Schwarcz HP (1998) Stable carbon and oxygen isotopes in human tooth enamel: identifying breastfeeding and weaning in prehistory. *American Journal of Physical Anthropology* 106:1-18.
16. Brettell R, Montgomery J, & Evans J (2012) Brewing and stewing: the effect of culturally mediated behaviour on the oxygen isotope composition of ingested fluids and the implications for human provenance studies. *Journal of Analytical Atomic Spectrometry* 27:778-785.
17. Schroeder HE (1992) *Orale Strukturbiologie: Entwicklungsgeschichte, Struktur und Funktion normaler Hart- und Weichgewebe der Mundhöhle und des Kiefergelenks* (Thieme, Stuttgart, New York) 4. überarbeitete Auflage Ed.
18. Schumacher G-H, Schmidt H, Börnig H, & Richter W (1990) *Anatomie und Biochemie der Zähne. 4. Auflage* (Gustav Fischer, Stuttgart, New York).
19. Knipper C, *et al.* (2014) Social differentiation and land use at an Early Iron Age "princely seat": Bioarchaeological investigations at the Glauberg (Germany). *Journal of Archaeological Science* 41:818-835.
20. Dettman DL, *et al.* (2001) Seasonal stable isotope evidence for a strong Asian monsoon throughout the past 10.7 Ma. *Geology* 29(1):31-34.
21. Tütken T, Vennemann TW, Janz H, & Heizmann EPJ (2006) Palaeoenvironment and palaeoclimate of the Middle Miocene lake in the Steinheim basin, SW Germany: A reconstruction from C, O, and Sr isotopes of fossil remains. *Palaeogeography, Palaeoclimatology, Palaeoecology* 241(3-4):457-491.
22. Vennemann TW, Fricke HC, Blake RE, O'Neil JR, & Colman A (2002) Oxygen isotope analyses of phosphates: a comparison of techniques for analysis of  $\text{Ag}_3\text{PO}_4$ . *Chemical Geology* 185:321-336.
